# Supplementary material for: BEESCOUT: A model of bee scouting behaviour and a software tool for characterizing nectar/pollen landscapes for BEEHAVE
Source: PubMed Central journal article supplement (PMC5070411; doi:10.1016/j.ecolmodel.2016.09.013), 2016-11-24
Supplement: mmc3.pdf [file mmc3.pdf]

---

**BEESCOUT**

---

User  
Manual

---

---

## Contents

|                                                                                                                                                                                                                                                                                                                                                                                                                                                 |    |
|-------------------------------------------------------------------------------------------------------------------------------------------------------------------------------------------------------------------------------------------------------------------------------------------------------------------------------------------------------------------------------------------------------------------------------------------------|----|
| 1. BEESCOUT: an introduction .....                                                                                                                                                                                                                                                                                                                                                                                                              | 2  |
| 1.1. Overview of Interface .....                                                                                                                                                                                                                                                                                                                                                                                                                | 2  |
| 2. Setup map .....                                                                                                                                                                                                                                                                                                                                                                                                                              | 4  |
| 2.1. Import crop map .....                                                                                                                                                                                                                                                                                                                                                                                                                      | 4  |
| If this is the first time you have used BEESCOUT, you can now run the model using the default settings to make yourself familiar with the output. To do this, go straight to section 3 of this manual. Once you are familiar with the model and wish to use your own scenarios, details of how to modify the landscape, set up forage patch attributes, and how to define bee colony type, size and behaviour are in sections 2.1.1 – 2.4 ..... | 5  |
| 2.1.1. Set scaling .....                                                                                                                                                                                                                                                                                                                                                                                                                        | 5  |
| 2.2. Create or modify a landscape .....                                                                                                                                                                                                                                                                                                                                                                                                         | 6  |
| 2.3. Define food flow of the patches .....                                                                                                                                                                                                                                                                                                                                                                                                      | 7  |
| 2.4. Search options and bee movement .....                                                                                                                                                                                                                                                                                                                                                                                                      | 8  |
| 3. Running the Model and Output options .....                                                                                                                                                                                                                                                                                                                                                                                                   | 9  |
| 3.1. Map Display.....                                                                                                                                                                                                                                                                                                                                                                                                                           | 10 |
| 3.2. Output plots and fields .....                                                                                                                                                                                                                                                                                                                                                                                                              | 10 |
| 3.3. Output a File for BEEHAVE .....                                                                                                                                                                                                                                                                                                                                                                                                            | 11 |
| 4. Display simulated visitation rates from BEEHAVE .....                                                                                                                                                                                                                                                                                                                                                                                        | 11 |
| 5. Summary tables .....                                                                                                                                                                                                                                                                                                                                                                                                                         | 13 |
| 5.1. Input options.....                                                                                                                                                                                                                                                                                                                                                                                                                         | 13 |
| 5.1.1. Setup map .....                                                                                                                                                                                                                                                                                                                                                                                                                          | 13 |
| 5.1.3. Advanced initialisations .....                                                                                                                                                                                                                                                                                                                                                                                                           | 14 |
| 5.1.4. “Input field” .....                                                                                                                                                                                                                                                                                                                                                                                                                      | 14 |
| 5.1.5. “Switch” .....                                                                                                                                                                                                                                                                                                                                                                                                                           | 16 |
| 5.1.6. “Chooser” .....                                                                                                                                                                                                                                                                                                                                                                                                                          | 17 |
| 5.1.7. “Slider” .....                                                                                                                                                                                                                                                                                                                                                                                                                           | 19 |
| 5.2. Output options.....                                                                                                                                                                                                                                                                                                                                                                                                                        | 20 |
| 5.2.1. Map display.....                                                                                                                                                                                                                                                                                                                                                                                                                         | 20 |
| 5.2.2. Output plots and fields .....                                                                                                                                                                                                                                                                                                                                                                                                            | 21 |
| 5.2.3. Output file for BEEHAVE .....                                                                                                                                                                                                                                                                                                                                                                                                            | 21 |
| 7. List of tables .....                                                                                                                                                                                                                                                                                                                                                                                                                         | 22 |

## 1. BEESCOUT: an introduction

BEESCOUT is a spatially explicit, individual-based model, used to determine detection probabilities of food sources for scouting bees. The model is able to identify the size and location of food patches and obstacles according to their colour, in a landscape of choice, by analysing a two-dimensional map, either read in as an image file or created within the program. The software can also produce input files for the honey bee model BEEHAVE (Becher et al. 2014) to allow the simulation of foraging in a specified landscape. In return BEESCOUT can display the simulated foraging activities imported from BEEHAVE on its map.

During a simulation bees explore the landscape, either in a linear flight pattern (when heading to a destination or returning to the colony) or in a smaller scaled flight pattern (when searching the landscape, or during their very first scouting trip). The movement of bees in the search phase is determined by a turning angle (i.e. the change in direction) and step length. Default values for these are based on empirical data from radar tracked bees, whereby turning angle is drawn from a random distribution.

A simulation will stop when the total time allowed for scouting is exceeded. The detection probabilities for the flower patches are then calculated and the results saved in an output file.

In this manual we explain what you see on the model interface when you open BEESCOUT, and then how to set up a landscape with a colony of bees. We explain the different options available for specifying the type and behaviour of the bees, and then show how the model runs, and what the outputs display. Options for creating input files for BEEHAVE, and displaying its output, are described. The last section of the manual contains tables of all the standard and advanced options for the set up, input and outputs.

**We recommend that when you first run the BEESCOUT model, you simply choose the initial default settings (i.e. make sure the model and all input files are unzipped and in the same folder, press the buttons "Default (Honeybees)" (under section "Setup Map") and then the button "BB" (Interface section 2 ("My scenarios")) for a small colony of 30 bumblebees placed in a landscape called Map\_Osborne.jpg with blue patches denoting where flowers with nectar and pollen are available) so that you become familiar with the interface and outputs.**

### 1.1. Overview of Interface

After you have started BEESCOUT, you will discover an interface tab comprising several initialisation and output options (use Control/– or control/+ to zoom the view). These are used to determine the number, location, size and detection probability of food sources for a bee colony, which can be input into the BEEHAVE colony model.

These options are explained in the following sections of this user manual:

- ◇ Setup map
- ◇ Search options and bee movement

- ◇ Running the model and Output options
- ◇ Display visitation rates from BEEHAVE

The screenshot displays the BEEHAVE software interface with the following annotated sections:

- 1.) Setup map:** A panel on the left for map configuration, including input files and satellite image options.
- 2.) My scenarios:** A panel for selecting and managing different simulation scenarios.
- 3.) Explore map:** A panel with navigation buttons like 'Go', 'Stop', and 'Clear Bees'.
- 4.) Show BEEHAVE foraging data:** A panel for displaying foraging data, including a 'Slide Show' button and a data table.
- 5.) Definition food patches:** A detailed panel for defining food patches, including color connections, crop types, phenology, nectar/pollen concentrations, and handling times.
- 6.) Artificial landscape creator:** A panel for creating and customizing the landscape, including drawing patches and setting parameters like size and color.
- 7.) Display:** A central panel for configuring the visual display of the simulation, such as showing detected patches and history.
- 8.) Search options:** A panel for setting search parameters like radius and scaling.
- 9.) Bee movement:** A panel for configuring bee movement parameters like linear and displacement factors.
- 10.) Scaling & hive:** A panel for scaling the simulation and setting hive parameters.
- 11.) Create BEEHAVE outfile:** A panel for saving simulation results to an output file.

The central map shows a landscape with various colored patches and a grid overlay. The bottom of the interface features a Command Center with a status bar.

Table 1. Different sections of the BEESCOUT user interface (also highlighted in red above) which will be referred to in the following sections

|    | Interface section            | Description                                                                                  |
|----|------------------------------|----------------------------------------------------------------------------------------------|
| 1  | Setup map                    | Import crop map, pre-defined scenarios                                                       |
| 2  | My scenarios                 | Set up (pre)defined scenarios                                                                |
| 3  | Explore the map              | Begin model simulation                                                                       |
| 4  | Show BEEHAVE foraging data   | Display foraging patterns simulated in BEEHAVE                                               |
| 5  | Definition food patches      | Define flower patches (nectar, pollen, handling times etc.)                                  |
| 6  | Artificial landscape creator | Create your own landscape                                                                    |
| 7  | Display                      | Adjust map display                                                                           |
| 8  | Search options               | Change between honeybees and bumblebees and the mode by which they explore forflower patches |
| 9  | Bee movement                 | Change characteristics of bee flight when she searches the landscape                         |
| 10 | Scaling & hive position      | Location of hive and scaling of map                                                          |
| 11 | Create BEEHAVE Outfile       | Creating an output file for BEEHAVE                                                          |

The Netlogo toolbar allows you to control the speed of simulation runs and the viewing of updates. Use the speed slider to control the speed of the model run, and use the chooser to adjust the frequency of viewing updates (from continuous to tick based; a “tick” refers to a time step in the model, which usually represents 3 seconds). Thus, “continuous updates” means that the Netlogo view will be updated many times a second, whereas “on-tick updates” means results in Netlogo view are only updated when the tick counter proceeds.

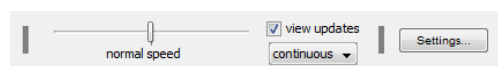

## 2. Setup map

During the initialisation process a crop map is either imported as an image file or created within the model. If a crop map is provided it can be updated using the artificial landscape creator.

### 2.1. Import crop map

1. Open a crop map in BEESCOUT. You can choose one already saved in the models folder or one of your own maps, as long as it is saved in an image file format (BMP, JPG, GIF, or PNG). To add your own map, right click on the input file drop down list, click edit and add the filename (+extension) in quotes e.g. “Myownmap.jpg”. Additionally, you can import a satellite image, to better relate the crop map to the real landscape.

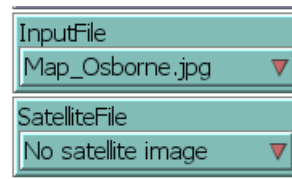

#### Interface section 1: select crop map and satellite image (if available)

2. Press "Setup" (**wait whilst button is black**; it can take a while, up to a few minutes).

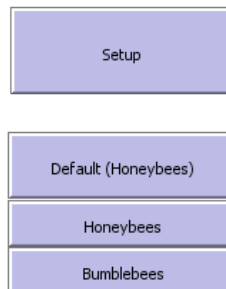

#### Stage 2 setup map

**If this is the first time you have used BEESCOUT, you can now run the model using the default settings (just press the button "BB" under "My Scenarios") to make yourself familiar with the output. To do this, go straight to section 3 of this manual.** The button "Default (Honeybees)" sets all input variables to their default values (except of RandSeed and Plot1-4), which represents a honeybee colony in an empty landscape. The button "Honeybees" sets only bee related input variables to the honeybee specific values and "Bumblebee" to the bumblebee specific values. The buttons "HB" and "BB" (Interface section 2, "My Scenarios") set up a honeybee or bumblebee colony in a real landscape with a defined colony location under otherwise default settings. Once you are familiar with the model and wish to use your own scenarios, details of how to modify the landscape, set up forage patch attributes, and how to define bee colony type, size and behaviour are in sections 2.1.1 – 2.4.

##### 2.1.1. Set scaling

Once a map is imported you will need to set the scale and location of the colony (Interface elements "Scaling & hive position").

3. To set the scale you will need the x coordinates of two known locations on the map. To find these, right click once on the map in each location (the x coordinate will be the first number after "inspect patch"). Enter these in "Scale\_X1" and "Scale\_X2" and the real distance between the two (the "Grid" button could help here) in the "ScaleDistance\_m" input fields.
4. To set the location of the colony you will need an x and y coordinate of its location, to do this right click where the colony is on the map once (the x coordinate is the first and the y coordinate the second number after "inspect patch"). Enter these values into "Col\_X" and "Col\_Y".

- If you wish, you can set up a new button in the "My Scenarios" section (right click on an area of white and click "Button"), **or** modify a button of "My Scenarios" (right click on e.g. "S1" and click "edit") to automatically scale your map or set up your own scenarios for future use.

```
set InputFile "Myownmap.jpg"
set ScaleDistance_m xxx
set Scale_X1 xxx
set Scale_X2 xxx
set COL_X xxx
set COL_Y xxx
(replace xxx with correct values)
```

- Press "Update scaling & hive". Be patient! Depending on the number of patches and ScaleDistance\_m this might take some time.

#### Scaling & hive position:

|                      |          |
|----------------------|----------|
| Scaling [m/hPatches] |          |
| 3.33                 |          |
| ScaleDistance_m      |          |
| 100                  |          |
| Scale_X1             | Scale_X2 |
| 70                   | 100      |
| Col_X                | Col_Y    |
| 184                  | 113      |
| Update               |          |

**Interface Section 10: Set the scale and location of the colony, update map.**

## 2.2. Create or modify a landscape

- If the map you have imported needs modifying, or you want to create our own, then you can do so with the **artificial landscape creator** (Interface section 6).
- To draw food patches directly onto the map using the mouse, click "Draw patches". As long as this button is black, you are in "patch drawing mode". To end this mode, click this button again. Specify your choice of colour from the drop down list "SetColour", draw on the map to define the location of one or more new patches (make sure the speed slider is set to "normal" and "N\_Bees" is small) Finally, click "Update map" to start the setup again and create the patch(es)
- To generate a patch of a certain size, direction and distance from the colony, specify your choice of colour from the drop down list. Set the size of the patch "SetRadius\_m", its

distance "SetDistanceToCentre\_m" and direction "SetDirection\_deg" from the colony. Press "Show" to add or "Delete" to remove this patch again.

10. To generate randomly distributed forage patches of minimal size specify your choice of colour from the drop down list ("SetColour") and press "Add sources". Similarly, "Add by colour" distributes additional small food sources, but only on those patches defined by "ReplaceColour". E.g. if "ReplaceColour" is set to 45 (yellow) and "SetColour" is set to red, then pressing "colour patches" would add small red patches on yellow areas. This might be useful to add small food sources to certain habitat types.
11. If necessary, you can change the colours once they have been drawn using the "Replace colour" buttons.
12. Press "**Update map**" when you are finished, and if you wish "Export map" to create an image file of the map. *Remember:* updating the map can take some time (the area of the map already analysed is presented in green to show the progress).

**Artificial landscape creator:** (requires "Update map")

|                |                                            |                       |
|----------------|--------------------------------------------|-----------------------|
| Draw patches   | SetColour<br>Yellow                        | Clear all             |
| BrushSize 3    | SetDistanceToCentre_m<br>250               | Add sources           |
| Export map     | SetDirection_deg 90 °                      | Add by colour         |
| Update map     | SetRadius_m<br>50                          | Show                  |
|                | Area of patch [km <sup>2</sup> ]<br>0.0079 | Delete                |
| Replace colour | ReplaceColour<br>85 (cyan)                 | ByColour<br>0 (black) |
|                |                                            |                       |

**Interface Section 6: Create your own landscape or improve an existing one, update map.**

### 2.3. Define food flow of the patches

13. Define food flow in the landscape, by turning different colour patches on and off. This determines whether they can be found while the bees are searching. The default+BB setting only has blue patches switched on, so these are the only ones that bees will detect.
14. You can also set the quantity of nectar and pollen and concentration of nectar available at the patches, according to their colour. Handling times of nectar and pollen and phenology of each patch can also be defined (Table 4). Note, however, that the nectar and pollen flow in the patches **does not** affect the searching behaviour of the bees in the BEESCOUT model, but is required to generate an input file for the honeybee model BEEHAVE.



|                                                                        |            |                                                                           |            |                                                                          |            |                                                                         |            |                                                                   |          |
|------------------------------------------------------------------------|------------|---------------------------------------------------------------------------|------------|--------------------------------------------------------------------------|------------|-------------------------------------------------------------------------|------------|-------------------------------------------------------------------|----------|
| <input type="checkbox"/> On<br><input type="checkbox"/> Off RedPatches |            | <input type="checkbox"/> On<br><input type="checkbox"/> Off YellowPatches |            | <input type="checkbox"/> On<br><input type="checkbox"/> Off GreenPatches |            | <input type="checkbox"/> On<br><input type="checkbox"/> Off BluePatches |            | <input type="checkbox"/> On<br><input type="checkbox"/> Off Lakes |          |
| Red_min                                                                | Red_max    | Yellow_min                                                                | Yellow_max | Green_min                                                                | Green_max  | Blue_min                                                                | Blue_max   | Black_th                                                          | White_th |
| 10                                                                     | 30         | 40                                                                        | 50         | 50                                                                       | 70         | 90                                                                      | 110        | 1                                                                 | 9        |
| Patchtype_R                                                            |            | Patchtype_Y                                                               |            | Patchtype_G                                                              |            | Patchtype_B                                                             |            | MaxPatchRadius_m                                                  |          |
| "RedField"                                                             |            | "YellowField"                                                             |            | "GreenField"                                                             |            | "BlueField"                                                             |            | 500                                                               |          |
| Start_R                                                                | Stop_R     | Start_Y                                                                   | Stop_Y     | Start_G                                                                  | Stop_G     | Start_B                                                                 | Stop_B     |                                                                   |          |
| 1                                                                      | 90         | 91                                                                        | 180        | 271                                                                      | 360        | 181                                                                     | 270        |                                                                   |          |
| Nectar_R                                                               | Pollen_R   | Nectar_Y                                                                  | Pollen_Y   | Nectar_G                                                                 | Pollen_G   | Nectar_B                                                                | Pollen_B   |                                                                   |          |
| 1                                                                      | 1          | 1                                                                         | 1          | 1                                                                        | 1          | 1                                                                       | 1          |                                                                   |          |
| t_Nectar_R                                                             | t_Pollen_R | t_Nectar_Y                                                                | t_Pollen_Y | t_Nectar_G                                                               | t_Pollen_G | t_Nectar_B                                                              | t_Pollen_B |                                                                   |          |
| 1200                                                                   | 600        | 1200                                                                      | 600        | 1200                                                                     | 600        | 1200                                                                    | 600        |                                                                   |          |
| Conc_R                                                                 |            | Conc_Y                                                                    |            | Conc_G                                                                   |            | Conc_B                                                                  |            |                                                                   |          |
| 1.5                                                                    |            | 1.5                                                                       |            | 1.5                                                                      |            | 1.5                                                                     |            |                                                                   |          |

### Interface Section 3: define food flow in the landscape

15. Create barriers which bees are unable to cross (during their searching phase), by turning "Lakes" on. If switched on, black areas are interpreted as lakes during the Setup process. Remember, if you alter any of the settings to define patches, you need to press the **setup** button again before running the model.
16. To make sure that the areas of food patches identified by BEESCOUT match closely the actual patch areas, you can fine tune the colour shades defining red, blue, yellow and green by setting suitable values for the "Min" and "Max" colour range under "colour corrections". Black/White\_th defines the thresholds for black and white. "Info colour" shows the NetLogo colour scheme to help you making your choice.

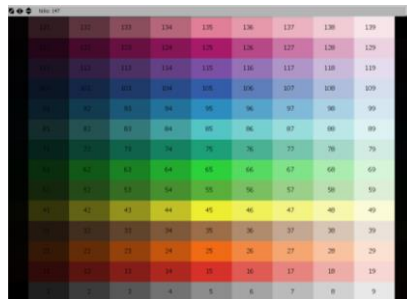

### Interface Section 5: Adjust colour of patches so that they are grouped into red, yellow, green, blue and black.

## 2.4. Search options and bee movement

17. Choose to simulate honeybees or bumblebees (choose honeybees for incorporation into BEEHAVE). Choose a search mode (p. 18), from the drop down options.

|                 |
|-----------------|
| BeeSpecies      |
| Bumblebees      |
| SearchMode      |
| random location |

### Interface Section 8: Choose bee species and search mode

18. Input the number of bees ("N\_Bees") in the colony, duration of a foraging trip "TripDuration\_s", the duration of the simulation "ScoutingPeriod\_hrs", and the random seed ("RandSeed")(Table 4). If RandSeed is set to values other than 0, it acts as input for the pseudo-random number generator so that runs can be reproduced.

|                |                    |
|----------------|--------------------|
| N_Bees         | RandSeed           |
| 10000          | 0                  |
| TripDuration_s | ScoutingPeriod_hrs |
| 1020           | 9                  |

#### Interface Section 9: Input the number of bees, trip duration, simulation duration and the random seed

19. Specify how the bees explore the landscape. Default values are based on empirical data from radar tracked honeybees. Alternatively, they can be changed to other flight patterns that have been discussed in relation to exploring animals for example:
- To create spiral movement of bees turn "FixTurningAngle" on and specify the angle of the turn using "FixRightTurn". Adjust the linearization factor to make movement more linear. Alternatively, turn "RandomWalk" on to ensure uncorrelated, random movement.
  - Adjust the probability that bees will loop around their field destination, using the "TurnToDestinationProb".
  - Adjust the step length of the bees flight by adjusting the "DisplacementFactor"
  - Turn random trip duration off and set trip time to a specified value. If "RandomTripDuration" is on, then the duration of each individual trip is randomly determined, with an average duration of TripDuration\_s seconds.
  - Select "ImmediateReturn" to have bees return to the hive as soon as they have detected a patch they had never visited before (or latest at the end of the trip).

|                                                                        |                       |                                                                        |                    |
|------------------------------------------------------------------------|-----------------------|------------------------------------------------------------------------|--------------------|
| LinearisationFactor                                                    | 1.00                  | DisplacementFactor                                                     | 1.0                |
| <input type="checkbox"/> On<br><input checked="" type="checkbox"/> Off | FixTurningAngle       | <input type="checkbox"/> On<br><input checked="" type="checkbox"/> Off | RandomWalk         |
| <input type="checkbox"/> On<br><input checked="" type="checkbox"/> Off | FixRightTurn          | <input type="checkbox"/> On<br><input checked="" type="checkbox"/> Off | RandomTripDuration |
|                                                                        | 0.2                   | <input type="checkbox"/> On<br><input checked="" type="checkbox"/> Off | ImmediateReturn    |
| <input type="checkbox"/> On<br><input checked="" type="checkbox"/> Off | TurnToDestinationProb |                                                                        | MaxTrips           |
|                                                                        | 0.02                  |                                                                        | 999999             |

#### Interface Section 4: Choose settings for bee movement

Once setup, the crop map is analysed to determine the number, size and type of flower patches (red, green, blue, or yellow), as well as their distance to the hive. Finally, virtual bees are created when you press **Go**.

### 3. Running the Model and Output options

The BEESCOUT interface displays bees foraging in the landscape on a central map. As well as, several output plots and monitors to closer examine the detectability of patches and foraging behaviour of the bees in real time.

### 3.1. Map Display

20. To start (and pause) the model press **“Go”**. Alternatively press **“Step”** to see the model progress for each time step (3 seconds). Use **“Clear Bees”** to reset the number of patch detections to zero and re-create bees. As soon as a simulation is started the map will show bees of different colours (Table 8) exploring the landscape (progress of the simulation can be seen on the monitor "Progress of simulation run [%]").

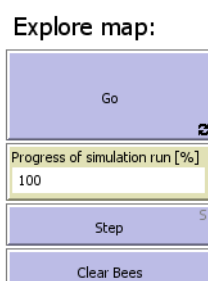

#### Interface Section 3: Start the simulation

21. Play with the display options (Table 8). For example, use the **“Pen”** to show tracks and **“Erase”** to remove.

|               |                |
|---------------|----------------|
| Reset         | Hide all       |
| Grey          | Color G/B/W    |
| Patches       | Labels         |
| Patchstats    | Detected       |
| model detProb | calc detProb   |
| History       | Distribution   |
| Bees          | Hive           |
| Borders       | Satellite      |
| Map           | Original color |
| Pen           | Erase          |

#### Interface Section 7: Change display options

### 3.2. Output plots and fields

While the model is running:

22. Take a look at output plots (Table 9). In the first graph, plots 1-4 define the numbered patches that are shown on the graph. Use **“Highlight patch”** to find a numbered patch on the map and show it on the graph.

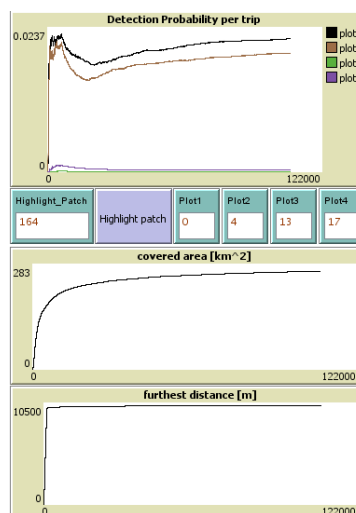

#### Observe output plots

23. Other output fields (Table 10) (currently below the search options) show the minimum and maximum number of trips the bees have performed so far.

| detected patches | hours passed | minutes passed | seconds passed | furthest distance [m] | min N trips | max N trips |
|------------------|--------------|----------------|----------------|-----------------------|-------------|-------------|
| 0                | 0            | 0              | 0              | 0                     | 1           | 1           |

#### Observe output fields

### 3.3. Output a File for BEEHAVE

- Specify a file name and press the “Analyse & Outfile” button. The crop map (“InputFile”) is automatically imported, analysed and represented on the central foraging map as before. The bees then start to explore the landscape and at the end of the run, the results are written in a file which contains information on size, location, nectar and pollen availability and detection probabilities of each identified food patch (Table 11). This file serves as input file for the BEEHAVE model.

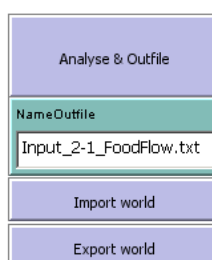

#### Interface Section 11: Create an output file for BEEHAVE

### 4. Display simulated visitation rates from BEEHAVE

Finally, BEESCOUT also has the option to visualise the foraging patterns of bees generated from a BEEHAVE simulation. BEEHAVE will record all nectar and pollen visits at all patches and will write these data to a file. This requires an input file (see section 3.3) to be created for and run in BEEHAVE

and in return an "InputForagingFile" to be created by BEEHAVE for BEESCOUT. Make sure you use the same map to display simulated visitation rates from BEEHAVE as when creating the input file for BEEHAVE in the first place.

2. Select the file and choose whether you would like to display nectar, pollen or all visits. Press "Read foraging data" and either "Slide show" or +/- x days to show the visitation rates at all patches for nectar and/or pollen foragers for each day of a 365d simulation.

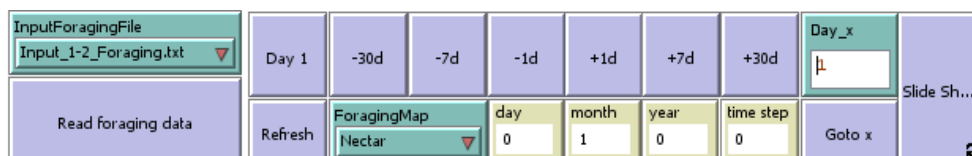

**Interface Section 4: Visualise foraging patterns of honeybees generated from a BEEHAVE simulation**

Users of the new Beehave\_BeeMapp(2015) version can create the foraging data file for BEESCOUT by pressing (in Beehave) the button "1-2 foraging file" (in the section "FILES - out"). Users of the original Beehave(2013) version can amend the model by editing the button "1-3 foraging file" (in the section "Special output") or create a new button (right mouse click on white area of the Beehave interface, "Button"). Copy the following code to the button's "Commands" box and choose a "Display name":

```

set ReadInfile TRUE
set StopDead false
Setup
let filename "Input_1-2_Foraging.txt"
if file-exists? filename [ file-delete filename ]
file-open filename
file-print count flowerPatches
file-print "day who nectarVisits pollenVisits"
repeat 365 [
  startProc
  foreach sort flowerpatches [ ask ? [
    file-type day file-type " "
    file-type oldPatchId file-type " "
    file-type nectarVisitsToday file-type " "
    file-type pollenVisitsToday file-print " "
  ] ]
]; end repeat
file-close
user-message "Input file ('Input_1-2_Foraging.txt') was created for the external landscape
module BEESCOUT"

```

## 5. Summary tables

### 5.1. Input options

The BEESCOUT interface offers a large number of input options using “Input fields”, “Switch” and “Chooser” buttons. These define the parameter settings, input data and a number of adjustment options for foraging processes. Thus, the following tables in this section give a review of the various input options in order to clarify these complex model initialisation settings. Moreover, initial settings (default values) of all input variables are demonstrated.

#### 5.1.1. Setup map

The interface tab of BEESCOUT provides several setup and running buttons that initiate and start the simulation run as well as offering the option to choose pre-defined scenarios.

The **Setup** button initiates the model settings called by the parameterisation procedure. It is only required if a new map is loaded, modified or the scaling or position of hive is changed, i.e. anything that changes the landscape in relation to the colony. The model can be run stepwise or continuously.

Furthermore, you can start pre-defined scenarios (Table 2).

Table 2 pre-defined scenarios available in BEESCOUT

| Pre-defined scenario | Function                                                                                                          | Interface section           |
|----------------------|-------------------------------------------------------------------------------------------------------------------|-----------------------------|
| Default (Honeybees)  | All input variables are reset to their default values, apart from RandSeed and Plot1-4; no InputFile (map) loaded | Setup map (1)               |
| Honeybees            | Sets (only) the bee related variables to their "honeybee" value                                                   | Setup map (1)               |
| Bumblebees           | Sets (only) the bee related variables to their "bumblebee" value                                                  | Setup map (1)               |
| HB                   | Sets default conditions (honeybees) with a crop map (RealLandscape.jpg) loaded                                    | My scenarios (2)            |
| BB                   | Sets a bumble bee colony with a crop map (Map_Osborne.jpg) loaded under otherwise default conditions              | My scenarios (2)            |
| Field beans          | Sets phenology and nectar & pollen production to the "Field beans" values                                         | Definition food patches (5) |
| Oilseed rape         | Sets phenology and nectar & pollen production to the "Oilseed rape" values                                        | Definition food patches (5) |
| Sunflower            | Sets phenology and nectar & pollen production to the "Sunflower" values                                           | Definition food patches (5) |
| Maize                | Sets phenology and nectar & pollen production to the                                                              | Definition food patches (5) |

|              | "Maize" values                                                             |                             |
|--------------|----------------------------------------------------------------------------|-----------------------------|
| White clover | Sets phenology and nectar & pollen production to the "White clover" values | Definition food patches (5) |

### 5.1.3. Advanced initialisations

You can choose several advanced model initialisations and outputs by clicking defined buttons during a model run (Table 3).

Table 3 create outfiles options

| Button              | Function                                                                                                                                                                                                        | Interface section              |
|---------------------|-----------------------------------------------------------------------------------------------------------------------------------------------------------------------------------------------------------------|--------------------------------|
| Analyse & Outfile   | Map is imported and analysed and bees explore the landscape as defined by the interfaces "Search mode" and "bee movement" options. At the end of a run, the results are written in a file for the BEEHAVE model | Create BEEHAVE outfile (11)    |
| Import world        | Imports an exported NetLogo "World" file                                                                                                                                                                        | Create BEEHAVE outfile (11)    |
| Export world        | Writes the current values of all variables, plots etc into a NetLogo "World" file                                                                                                                               | Create BEEHAVE outfile (11)    |
| Show foraging range | Highlights the foraging range of bees                                                                                                                                                                           | Show BEEHAVE foraging data (4) |

### 5.1.4. "Input field"

Input fields allow you to initialise and change the most important parameter settings of foraging processes (Table 4).

Table 4 input fields

| Variable              | Definition                                                                  | Initial Setting | Interface          |
|-----------------------|-----------------------------------------------------------------------------|-----------------|--------------------|
| RandSeed              | Initial value of the pseudo-random number generator; undefined if set to 0. | not set         | Search options (8) |
| N_Bees                | Initial colony size                                                         | 10000           | Search options (8) |
| TripDuration_s        | Duration of a scouting trip                                                 | 1020            | Search options (8) |
| ScoutingPeriod_hrs    | Total duration of the simulation                                            | 9               | Search options (8) |
| FixRightTurn          | Set turning angle for every step                                            | 0.2             | Bee movement (9)   |
| TurnToDestinationProb | Probability that a bee will loop before a patch                             | 0.02            | Bee movement (9)   |
| MaxTrips              | Maximum number of scouting trips                                            | 999999          | Bee movement (9)   |

|                                                          |                                                                                    |                                                            |                                  |
|----------------------------------------------------------|------------------------------------------------------------------------------------|------------------------------------------------------------|----------------------------------|
| SetDistanceToCentre_m                                    | Distance of patch from the colony                                                  | 3500                                                       | Artificial landscape creator (6) |
| SetRadius_m                                              | Radius of patch                                                                    | 500                                                        | Artificial landscape creator (6) |
| Highlight_Patch                                          | Patch number to be highlighted                                                     | 0                                                          | Artificial landscape creator (6) |
| Plot1<br>Plot2<br>Plot3<br>Plot4                         | Define the number patch for which the detection probability is plotted             | not set                                                    | Artificial landscape creator (6) |
| Day_x                                                    | Defines the number of days simulated by the "Goto x" button                        | 1                                                          | Show BEEHAVE foraging data (4)   |
| MaxForagingRange_m                                       | Maximum foraging distance of the colony                                            | 10000                                                      | Show BEEHAVE foraging data (4)   |
| MaxVisitsColour                                          | allows to adjust the display of simulated foraging visits to the foraging activity | 1000                                                       | Show BEEHAVE foraging data (4)   |
| red_min<br>yellow_min<br>green_min<br>blue_min           | Minimum Netlogo colour value for a grid cell to be interpreted as red, blue etc.   | 10<br>40<br>50<br>90                                       | Definition food patches (5)      |
| red_max<br>yellow_max<br>green_max<br>blue_max           | Maximum Netlogo colour value for a grid cell to be interpreted as red, blue etc.   | 30<br>50<br>70<br>110                                      | Definition food patches (5)      |
| Patchtype_R<br>Patchtype_Y<br>Patchtype_G<br>Patchtype_B | Name given to patch/crop type                                                      | "RedField"<br>"YellowField"<br>"GreenField"<br>"BlueField" | Definition food patches (5)      |
| Start_R<br>Start_Y<br>Start_G<br>Start_B                 | First day of flowering in the year                                                 | 1<br>91<br>271<br>181                                      | Definition food patches (5)      |
| Stop_R<br>Stop_Y<br>Stop_G<br>Stop_B                     | Last day of flowering in the year                                                  | 90<br>180<br>360<br>270                                    | Definition food patches (5)      |
| Nectar_R<br>Nectar_Y<br>Nectar_G<br>Nectar_B             | Quantity of nectar available at each patch [ml/ m <sup>2</sup> ]                   | 1<br>1<br>1<br>1                                           | Definition food patches (5)      |
| Pollen_R<br>Pollen_Y<br>Pollen_G<br>Pollen_B             | Quantity of pollen available at each patch [g/ m <sup>2</sup> ]                    | 1<br>1<br>1<br>1                                           | Definition food patches (5)      |
| T_Nectar_R<br>T_Nectar_Y<br>T_Nectar_G                   | Time spent handling nectar [s] at each patch of that type                          | 1200<br>1200<br>1200                                       | Definition food patches (5)      |



|                                                      |                                                                                                                                                             |                          |                                |
|------------------------------------------------------|-------------------------------------------------------------------------------------------------------------------------------------------------------------|--------------------------|--------------------------------|
| T_Nectar_B                                           |                                                                                                                                                             | 1200                     |                                |
| T_Pollen_R<br>T_Pollen_Y<br>T_Pollen_G<br>T_Pollen_B | Time spend handling pollen [s] at each patch of that type                                                                                                   | 600<br>600<br>600<br>600 | Definition food patches (5)    |
| Conc_R<br>Conc_Y<br>Conc_G<br>Conc_B                 | Sucrose concentration of nectar at each patch of that type [mol/l]                                                                                          | 1.5<br>1.5<br>1.5<br>1.5 | Definition food patches (5)    |
| Black_th                                             | Max. threshold of dark colours to be interpreted as black                                                                                                   | 1                        | Definition food patches (5)    |
| White_th                                             | Min. threshold of light colours to be interpreted as white                                                                                                  | 9                        | Definition food patches (5)    |
| MaxPatchRadius_m                                     | Defines the maximum radius a patch can have, i.e. any patch of the same colour which is larger than this value will be divided into two or more sub patches | 500                      | Definition food patches (5)    |
| ScaleDistance_m                                      | Real distance between two X coordinates on the map                                                                                                          | 3000                     | Scaling and hive position (10) |
| Scale_X1                                             | X coordinate for reference point 1                                                                                                                          | 181                      | Scaling and hive position (10) |
| Scale_X2                                             | X coordinate for reference point 2                                                                                                                          | 210                      | Scaling and hive position (10) |
| Col_X                                                | X coordinate of colony                                                                                                                                      | 160                      | Scaling and hive position      |
| Col_Y                                                | Y coordinate of colony                                                                                                                                      | 106                      | Scaling and hive position (10) |
| NameOutfile                                          | Specify a name for the out file to be used as an input file for the BEEHAVE colony model.                                                                   | "Input_2-1_FoodFlow.txt" | Create BEEHAVE out file (11)   |

### 5.1.5. "Switch"

The BEESCOUT interface tab includes a large number of switches for Boolean variables. Here important input data and settings are specified (Table 5).

Table 5 switch variables

| "Switch" variable | Definition                                                          | Default | Interface        |
|-------------------|---------------------------------------------------------------------|---------|------------------|
| FixTurningAngle   | Sets turning angle (on) resulting in circular movement              | Off     | Bee movement (9) |
| RandomWalk        | Random turning angle is chosen from equal distribution resulting in | Off     | Bee movement (9) |

|                    |                                                                                           |     |                             |
|--------------------|-------------------------------------------------------------------------------------------|-----|-----------------------------|
|                    | uncorrelated random walk.                                                                 |     |                             |
| RandomTripDuration | Trip duration is randomly determined (on), or set to a specified value (off)              | On  | Bee movement (9)            |
| ImmediateReturn    | Bee switches to flight phase 3 (Table 8), and returns to hive when it detects a new patch | Off | Bee movement (9)            |
| RedPatches         | Turns red patches on or off (change requires new setup)                                   | Off | Definition food patches (5) |
| YellowPatches      | Turns yellow patches on or off (change requires new setup)                                | Off | Definition food patches (5) |
| GreenPatches       | Turns green patches on or off (change requires new setup)                                 | Off | Definition food patches (5) |
| BluePatches        | Turns blue patches on or off (change requires new setup)                                  | Off | Definition food patches (5) |
| Lakes              | Turns lakes on or off (change requires new setup)                                         | Off | Definition food patches (5) |

### 5.1.6. "Chooser"

Additionally, the BEESCOUT interface tab offers several chooser input options. These allow for different example landscapes to be input into the model, as well as different search modes of the bees to be specified (Table 6).

Table 6 chooser variables

| "Chooser" variable | Definition                                                                                                                                                                                                                                                                                                                           | Options                                                                                               | Interface     |
|--------------------|--------------------------------------------------------------------------------------------------------------------------------------------------------------------------------------------------------------------------------------------------------------------------------------------------------------------------------------|-------------------------------------------------------------------------------------------------------|---------------|
| InputFile          | Choose a crop map to be imported. The user has to set reference points and the real distance for the correct scaling. If no input file for a crop map is provided, then the colour (originalColor) of all Netlogo patches is set to grey. The user can then define food patches with the help of the "Artificial landscape creator". | "No input file"<br>"RealLandscape.jpg"<br>"Map_Osborne.jpg"<br>"MapImageUpdate.png"<br>"MapImage.png" | Setup map (1) |
| SatelliteFile      | Import satellite image to better relate the crop map to the real landscape                                                                                                                                                                                                                                                           | No satellite image                                                                                    | Setup map (1) |
| InputForagingFile  | Choose an input file created by a                                                                                                                                                                                                                                                                                                    | Input_1-2_Foraging.txt                                                                                | Show BEEHAVE  |

|             |                                                                                                                                    |                                                                                                                                                                                                                                                                                  |                                  |
|-------------|------------------------------------------------------------------------------------------------------------------------------------|----------------------------------------------------------------------------------------------------------------------------------------------------------------------------------------------------------------------------------------------------------------------------------|----------------------------------|
|             | simulation run of BEEHAVE to visualize the foraging patterns the bees                                                              |                                                                                                                                                                                                                                                                                  | foraging data (4)                |
| ForagingMap | Simple representation of patches offering available nectar and pollen in the landscape and current foraging activities of the bees | Nectar<br>Pollen<br>All visits                                                                                                                                                                                                                                                   | Show BEEHAVE foraging data (4)   |
| SetColour   | Choose colour of patch being drawn by the artificial landscape creator; use grey to delete patches                                 | Red<br>Yellow<br>Green<br>Blue<br>Black<br>Grey                                                                                                                                                                                                                                  | Artificial landscape creator (6) |
| BeeSpecies  | Select honeybees or bumblebees                                                                                                     | Honeybees<br>Bumblebees                                                                                                                                                                                                                                                          | Search options (8)               |
| SearchMode  | Options for how a bee chooses its field destination                                                                                | "colony"<br>"known flowerpatch (individual)"<br>"known flowerpatch (recruitment)"<br>"random location"<br>"visited NLpatch (recruitment)"<br>"furthest location (individual)"<br>"last location (individual)"<br>"mixed strategy (individual)"<br>"mixed strategy (recruitment)" | Search options (8)               |

### The search modes

To define where bees start searching in the landscape after they have left the colony, (described below as the 'field destination' i.e. when flightPhase2 begins) the user can choose between SearchModes options. These options take into account possible memory/knowledge of patches already encountered either by the individual bee, or by another bee in the colony.

SearchModes options are:

(i) "colony": no field destination is chosen. On leaving the colony the bee immediately switches to flightPhase 2 to search the area around the hive or colony. This would be a typical choice if the bees have not flown in the landscape before, and do not have information from other bees in the colony.

(ii) "known flowerpatch (individual)": the bee randomly chooses one location that is part of a flower patch already detected by this individual bee. Hence, bigger flower patches are proportionally more likely to be chosen. This could represent the search pattern of bumble bees, where individual bees learn about the landscape, but don't communicate food source locations to their nestmates.

(iii) "known flowerpatch (recruitment)": similar to "known flowerpatch (individual)", but now, a location in any patch that was detected by any bee can become the new destination. Again, the probability of a flower patch to be chosen is proportional to its size. This might occur if bees have information from other nestmates about patch locations (from decoding waggle dances for example).

(iv) "furthest location (individual)": the bee chooses the location which is the furthest from the hive that it has ever been as its new destination. This could represent the search patterns of bees in a poor landscape, with a low density of flower patches, which forces bees to venture further afield.

(v) "visited location (recruitment)": the new destination of a bee is randomly chosen from a location that was previously visited by any bee and is not placed in a lake. (Note that bees can cross lakes when they have a destination). This could be a search mode for honey bees in a landscape with highly transient food sources or if the precision of dances is very low.

(vi) "last location (individual)": the last location a bee has been before it returned to the hive is chosen as destination. This search mode could apply to honey bees and bumble bees with scouts resuming searching at the previously visited location.

(vii) "mixed strategy (individual)": before each scouting trip, one of the above SearchModes that do not require communication ("colony", "known flowerpatch (individual)", "furthest location (individual)", "last location (individual)") is randomly chosen.

(viii) "mixed strategy (recruitment)": before each scouting trip, one of the above colony SearchModes ("colony", "visited NLpatch (recruitment)", "known flowerpatch (recruitment)", "furthest location (individual)", "last location (individual)") is randomly chosen, irrespective if or if not communication is required. The "mixed strategy" search modes take into account that bees will adapt their search behaviour depending on landscape structure and scouting success.

(ix) "random location": any location randomly chosen within the maximal foraging range (MaxForagingRange\_m) of the bees, irrespective of whether it has been visited before. This might reflect a situation of an established honeybee colony in a dynamic landscape, where the colony has explored the complete potential foraging area and food sources could regularly appear and disappear in the landscape. It is not included into the "mixed strategy" search modes as it would overpower the effect of the other search modes.

#### 5.1.7. "Slider"

Additionally, the BEESCOUT interface also has several slider options, which allow for a variable to be adjusted on a sliding scale (Table 7).

Table 7 slider variables

| "Slider" variable | Definition                                       | Range  | Interface                        |
|-------------------|--------------------------------------------------|--------|----------------------------------|
| Gridsize          | Grid size of the foraging map                    | 0-2000 | Show BEEHAVE foraging data (4)   |
| Brushsize         | Size of food patch drawn directly from the mouse | 0-30   | Artificial landscape creator (6) |
| SetDirection_deg  | Set direction of patch from hive                 | 0-360  | Artificial landscape creator (6) |

|                     |                                                                     |      |                  |
|---------------------|---------------------------------------------------------------------|------|------------------|
| LinearisationFactor | Multiplied to the turning angle to allow for a more linear movement | 0-1  | Bee movement (9) |
| DisplacementFactor  | Factor with which the step length is multiplied                     | 0-10 | Bee movement (9) |

## 5.2. Output options

### 5.2.1. Map display

Foraging activities of the bees are illustrated on a two-dimensional landscape representation, the “foraging map”.

Table 8 map display options (interface section 7)

| Button             | Function                                                                                                                                                                                                                                                                                                                                                                                                                                                                                                      |               |             |              |       |                                     |   |       |                         |   |        |                                |   |      |                     |   |
|--------------------|---------------------------------------------------------------------------------------------------------------------------------------------------------------------------------------------------------------------------------------------------------------------------------------------------------------------------------------------------------------------------------------------------------------------------------------------------------------------------------------------------------------|---------------|-------------|--------------|-------|-------------------------------------|---|-------|-------------------------|---|--------|--------------------------------|---|------|---------------------|---|
| Reset              | resets map to the default display                                                                                                                                                                                                                                                                                                                                                                                                                                                                             |               |             |              |       |                                     |   |       |                         |   |        |                                |   |      |                     |   |
| Grey               | turns all patches grey                                                                                                                                                                                                                                                                                                                                                                                                                                                                                        |               |             |              |       |                                     |   |       |                         |   |        |                                |   |      |                     |   |
| Hide all           | hides the bees and the colony, turns all gridcells grey                                                                                                                                                                                                                                                                                                                                                                                                                                                       |               |             |              |       |                                     |   |       |                         |   |        |                                |   |      |                     |   |
| Patches            | shows/hides food patches & lakes                                                                                                                                                                                                                                                                                                                                                                                                                                                                              |               |             |              |       |                                     |   |       |                         |   |        |                                |   |      |                     |   |
| Color G/B/W        | Turns all gridcells black, white and grey                                                                                                                                                                                                                                                                                                                                                                                                                                                                     |               |             |              |       |                                     |   |       |                         |   |        |                                |   |      |                     |   |
| Labels             | shows/hides patch labels                                                                                                                                                                                                                                                                                                                                                                                                                                                                                      |               |             |              |       |                                     |   |       |                         |   |        |                                |   |      |                     |   |
| Patchstats         | shows/hides the Patch statistics (entities keeping track of the detections in each food patch)                                                                                                                                                                                                                                                                                                                                                                                                                |               |             |              |       |                                     |   |       |                         |   |        |                                |   |      |                     |   |
| model/calc DetProb | shows the detection probability of the patches, based on modelled detections or on a calculation                                                                                                                                                                                                                                                                                                                                                                                                              |               |             |              |       |                                     |   |       |                         |   |        |                                |   |      |                     |   |
| Detected           | highlights area of patch detected by bees                                                                                                                                                                                                                                                                                                                                                                                                                                                                     |               |             |              |       |                                     |   |       |                         |   |        |                                |   |      |                     |   |
| History            | shows the chronology of detections                                                                                                                                                                                                                                                                                                                                                                                                                                                                            |               |             |              |       |                                     |   |       |                         |   |        |                                |   |      |                     |   |
| Distribution       | highlights locations that were visited by the bees                                                                                                                                                                                                                                                                                                                                                                                                                                                            |               |             |              |       |                                     |   |       |                         |   |        |                                |   |      |                     |   |
| Bees               | shows or hides foraging bees <table border="1" data-bbox="810 1352 1401 1800"> <thead> <tr> <th>Colour of bee</th> <th>Description</th> <th>Flight phase</th> </tr> </thead> <tbody> <tr> <td>Green</td> <td>Leaving colony toward a destination</td> <td>1</td> </tr> <tr> <td>White</td> <td>Searching the landscape</td> <td>2</td> </tr> <tr> <td>Orange</td> <td>“Looping” behaviour at a patch</td> <td>2</td> </tr> <tr> <td>Blue</td> <td>Returning to colony</td> <td>3</td> </tr> </tbody> </table> | Colour of bee | Description | Flight phase | Green | Leaving colony toward a destination | 1 | White | Searching the landscape | 2 | Orange | “Looping” behaviour at a patch | 2 | Blue | Returning to colony | 3 |
| Colour of bee      | Description                                                                                                                                                                                                                                                                                                                                                                                                                                                                                                   | Flight phase  |             |              |       |                                     |   |       |                         |   |        |                                |   |      |                     |   |
| Green              | Leaving colony toward a destination                                                                                                                                                                                                                                                                                                                                                                                                                                                                           | 1             |             |              |       |                                     |   |       |                         |   |        |                                |   |      |                     |   |
| White              | Searching the landscape                                                                                                                                                                                                                                                                                                                                                                                                                                                                                       | 2             |             |              |       |                                     |   |       |                         |   |        |                                |   |      |                     |   |
| Orange             | “Looping” behaviour at a patch                                                                                                                                                                                                                                                                                                                                                                                                                                                                                | 2             |             |              |       |                                     |   |       |                         |   |        |                                |   |      |                     |   |
| Blue               | Returning to colony                                                                                                                                                                                                                                                                                                                                                                                                                                                                                           | 3             |             |              |       |                                     |   |       |                         |   |        |                                |   |      |                     |   |
| Hive               | shows/hides the colony                                                                                                                                                                                                                                                                                                                                                                                                                                                                                        |               |             |              |       |                                     |   |       |                         |   |        |                                |   |      |                     |   |
| Borders            | shows/hides the borders of the map                                                                                                                                                                                                                                                                                                                                                                                                                                                                            |               |             |              |       |                                     |   |       |                         |   |        |                                |   |      |                     |   |
| Satellite          | shows satellite image (if available)                                                                                                                                                                                                                                                                                                                                                                                                                                                                          |               |             |              |       |                                     |   |       |                         |   |        |                                |   |      |                     |   |
| Map                | shows the map after colour corrections                                                                                                                                                                                                                                                                                                                                                                                                                                                                        |               |             |              |       |                                     |   |       |                         |   |        |                                |   |      |                     |   |
| Original color     | shows the original colours of the loaded image                                                                                                                                                                                                                                                                                                                                                                                                                                                                |               |             |              |       |                                     |   |       |                         |   |        |                                |   |      |                     |   |
| Pen                | draws the tracks of the bees                                                                                                                                                                                                                                                                                                                                                                                                                                                                                  |               |             |              |       |                                     |   |       |                         |   |        |                                |   |      |                     |   |

|       |                                                                        |
|-------|------------------------------------------------------------------------|
| Erase | deletes the tracks of the bees                                         |
| Grid  | Adds a grid to the foraging map, size determined by "Grid size" slider |

### 5.2.2. Output plots and fields

Live-updating plots and fields show foraging dynamics of bees simulated within BEESCOUT

Table 9 output plots

| Plot variable                   | Description                                                                                  |
|---------------------------------|----------------------------------------------------------------------------------------------|
| Covered area [km <sup>2</sup> ] | Distance covered by all bees in the simulation                                               |
| Furthest distance [m]           | Furthest distance travelled in the simulation                                                |
| Detection probability per trip  | Detection probability per trip, each plot is set to a patch of choice using "Plot1-4" fields |

Table 10 output fields

| Field variable        | Description                                             |
|-----------------------|---------------------------------------------------------|
| Time passed [min]     | Time in minutes of model simulation                     |
| Time passed [s]       | Time in seconds of model simulation                     |
| Detected patches      | Number of patches detected by scouting bees             |
| Furthest distance [m] | Furthest distance travelled by scouting bees            |
| Min N trips           | Minimum number of scouting trips                        |
| Mean N trips          | Mean number of scouting trips                           |
| Date                  | Current date of the (previously ran) BEEHAVE simulation |
| Time step             | Number time step (time step is every 3 seconds)         |
| Scaling [m/nlPatches] | Size [m] of a Netlogo grid cell                         |

### 5.2.3. Output file for BEEHAVE

BEESCOUT can also be used to create an input file (*NameOutfile*) for the BEEHAVE colony model.

Table 11 structure of BEESCOUT output file for BEEHAVE

| Column | Description                                                                                                                                                                                                      |
|--------|------------------------------------------------------------------------------------------------------------------------------------------------------------------------------------------------------------------|
| 1      | day: the day of year (1..365)                                                                                                                                                                                    |
| 2      | id: the id of a food patch (0.. N food patches within <i>MaxForagingRange_m</i> )                                                                                                                                |
| 3      | oldPatchID: the original id ( <i>who</i> ) of a food patch (i.e. the number shown in the map of the interface) (identical with id, unless food patches are removed due to a limiting <i>MaxForagingRange_m</i> ) |
| 4      | patchType: information about the crop or flowers in the patch (e.g. "OSR" or "RedPatch")                                                                                                                         |
| 5      | distance_m: closest distance [m] of the patch to the hive                                                                                                                                                        |
| 6      | xcor: distance [m] on x-axis to the hive                                                                                                                                                                         |
| 7      | ycor: distance [m] on y-axis to the hive                                                                                                                                                                         |
| 8      | size_sqm: size of the food patch [m <sup>2</sup> ]                                                                                                                                                               |

|    |                                                                                                                                                                              |
|----|------------------------------------------------------------------------------------------------------------------------------------------------------------------------------|
| 9  | quantityPollen_g: amount of pollen [g] offered at the patch today                                                                                                            |
| 10 | concentration: sugar (sucrose) concentration [mol/l] of the nectar                                                                                                           |
| 11 | quantityNectar_l: amount of nectar [l] offered at the patch today                                                                                                            |
| 12 | calculatedDetectionProb_per_trip: the probability that a scout finds the food patch during a single scouting trip, calculated on the basis of size and distance of the patch |
| 13 | modelledDetectionProb_per_trip: the probability that a scout finds the food patch during a single scouting trip as an output of the simulation run                           |
| 14 | nectarGathering_s: handling time [s] for nectar, i.e. the time a bee has to spent in a patch to fill its crop                                                                |
| 15 | pollenGathering_s: handling time [s] for pollen, i.e. the time a bee has to spent in a patch collect a pollen load                                                           |

## 7. List of tables

|                                                                                                |    |
|------------------------------------------------------------------------------------------------|----|
| Table 1 different sections of the BEESCOUT user interface (also highlighted in red above)..... | 4  |
| Table 2 pre-defined scenarios available in BEESCOUT .....                                      | 13 |
| Table 3 advanced model initialisations.....                                                    | 14 |
| Table 4 input fields.....                                                                      | 14 |
| Table 5 switch variables .....                                                                 | 16 |
| Table 6 chooser variables .....                                                                | 17 |
| Table 7 slider variables.....                                                                  | 19 |
| Table 8 map display options .....                                                              | 20 |
| Table 9 output plots.....                                                                      | 21 |
| Table 10 output fields .....                                                                   | 21 |
| Table 11 structure of BEESCOUT output file for BEEHAVE .....                                   | 21 |
