# Supplementary material for: BEESCOUT: A model of bee scouting behaviour and a software tool for characterizing nectar/pollen landscapes for BEEHAVE
Source: PubMed Central journal article supplement (PMC5070411; doi:10.1016/j.ecolmodel.2016.09.013), 2016-11-24
Supplement: mmc12.pdf [file mmc12.pdf]

## Comparison empirical and modelled bumblebee flight paths

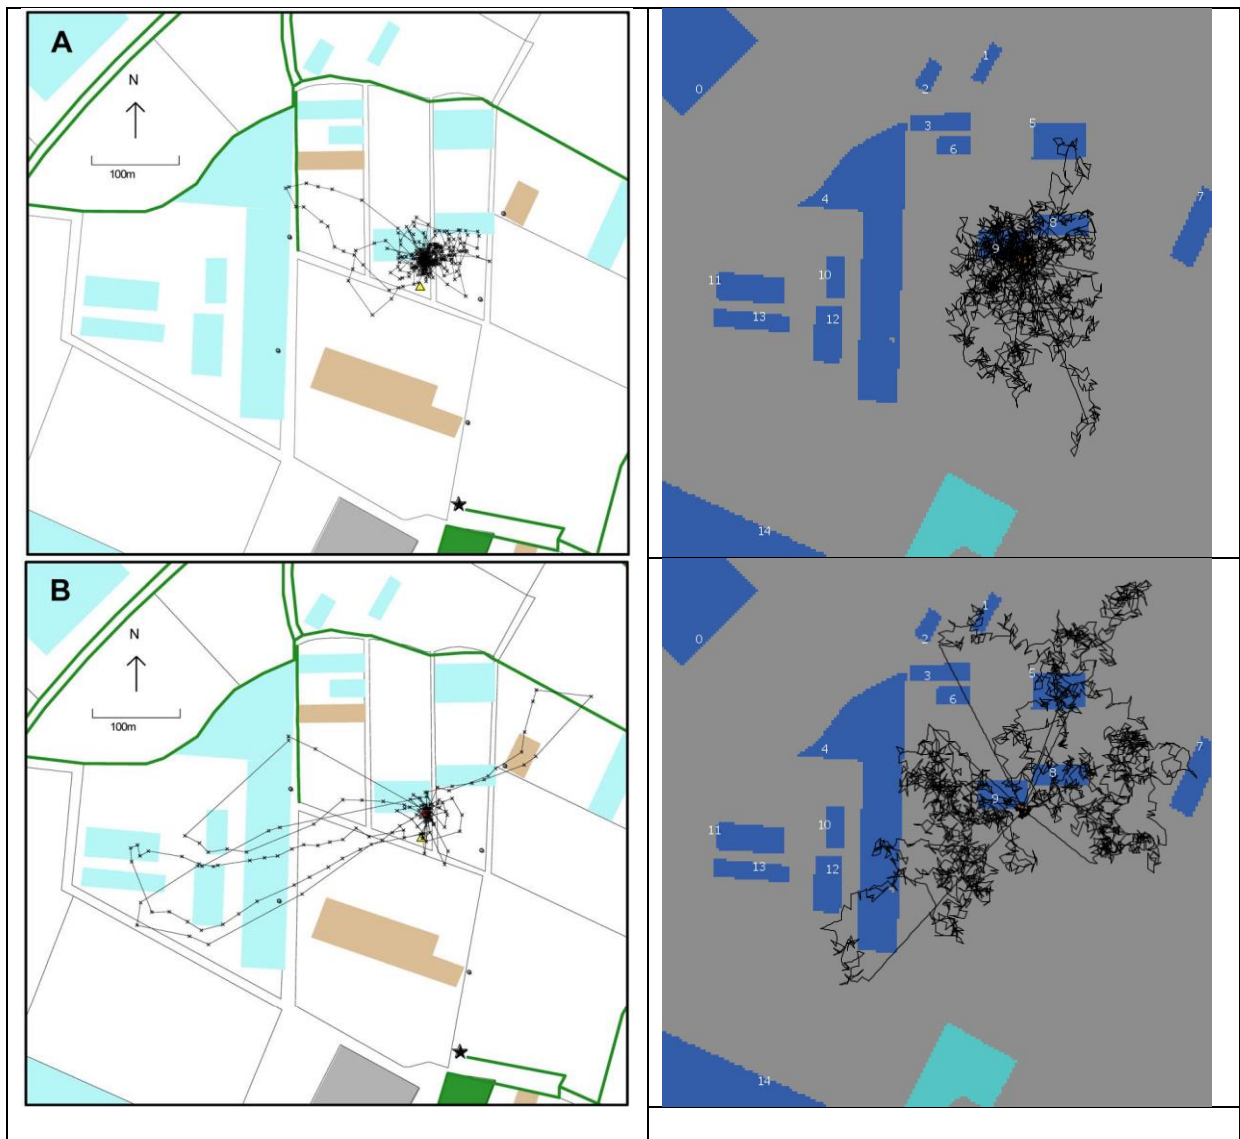

Empirical (left, from Osborne et al. 2013) and an example of modelled (right) tracks of bumble bees ( $N_{\text{Simulations}} = 1$ ). A) Bees on their first scouting trip ( $n = 14$ ), B) bees on 2<sup>nd</sup> and 3<sup>rd</sup> trips (modelled: only 3<sup>rd</sup> trip)( $n = 6$ ). Experimental bees were more directed in their flights – likely as some of them began to forage and stopped searching- whilst the model shows continued searching behaviour – but the flight ranges of modelled and empirical data match well.
